# Supplementary material for: The association between empathy and burnout in medical students: a systematic review and meta-analysis
Source: Research Square preprint supplement (doi:10.21203/rs.3.rs-3878990/v1), 2024-01-30
Supplement: Supplementary file [file 2b6a77b41bbf863064194dba.pdf]

Supplementary Table S1 – Quality rating for included studies

| Study (first author, year)    | Item 1 | Item 2 | Item 3 | Item 4 | Item 5 | Item 6 | Item 7 | Item 8 | Item 9 | Item 10 | Item 11 | Item 12 | Item 13 | Item 14 | Quality Rating |
|-------------------------------|--------|--------|--------|--------|--------|--------|--------|--------|--------|---------|---------|---------|---------|---------|----------------|
| Bigdeli et al. 2021           | +      | +      | NR     | +      | +      | -      | -      | +      | +      | NA      | +       | NA      | NA      | -       | Fair           |
| Bohler et al. 2021            | +      | +      | NR     | +      | -      | -      | +      | +      | -      | NA      | +       | NA      | NA      | -       | Fair           |
| Brazeau et al. 2010           | +      | +      | +      | +      | -      | -      | -      | +      | +      | NA      | +       | NA      | NA      | +       | Fair           |
| Cangussu Silva et al. 2018    | +      | +      | +      | +      | -      | -      | -      | +      | +      | NA      | +       | NA      | NA      | -       | Fair           |
| Capdevila-Gaudens et al. 2021 | +      | +      | -      | +      | +      | -      | -      | +      | +      | NA      | +       | NA      | NA      | +       | Fair           |
| Carrard et al. 2022           | +      | +      | -      | +      | -      | -      | -      | +      | +      | NA      | +       | NA      | NA      | -       | Fair           |
| Chae et al. 2017              | +      | +      | +      | NR     | -      | -      | -      | +      | +      | NA      | +       | NA      | NA      | -       | Fair           |
| Damiano et al. 2017           | +      | +      | -      | +      | -      | -      | -      | -      | +      | NA      | +       | NA      | NA      | -       | Fair           |
| DeWitt et al. 2016            | +      | +      | -      | +      | -      | -      | -      | +      | +      | NA      | +       | NA      | NA      | -       | Fair           |
| Dyrbye et al. 2021            | +      | +      | -      | +      | -      | +      | +      | +      | +      | +       | +       | NA      | NA      | +       | Good           |
| Gradiski et al. 2022          | +      | +      | +      | +      | +      | -      | -      | +      | -      | NA      | +       | NA      | NA      | -       | Fair           |
| Greenmyer et al. 2022         | +      | +      | +      | +      | -      | -      | -      | +      | +      | NA      | +       | NA      | NA      | -       | Fair           |
| Kilic et al. 2021             | +      | +      | -      | +      | -      | -      | -      | +      | +      | NA      | -       | NA      | NA      | +       | Fair           |
| Lucchetti et al. 2018         | +      | +      | -      | +      | -      | -      | -      | +      | +      | NA      | +       | NA      | NA      | -       | Fair           |
| Paro et al. 2014              | +      | +      | +      | +      | +      | -      | -      | +      | +      | NA      | +       | NA      | NA      | -       | Fair           |
| Shin et al. 2022              | +      | +      | NR     | +      | -      | -      | -      | +      | +      | NA      | +       | NA      | NA      | +       | Fair           |
| Stosic et al. 2022            | +      | +      | -      | +      | +      | -      | +      | +      | +      | NA      | +       | NA      | NA      | -       | Fair           |
| Suh et al. 2019               | +      | +      | +      | +      | -      | -      | -      | +      | +      | NA      | +       | NA      | NA      | -       | Fair           |

|                          |   |   |   |   |   |   |   |   |   |    |   |    |    |    |   |      |
|--------------------------|---|---|---|---|---|---|---|---|---|----|---|----|----|----|---|------|
| von Harscher et al. 2018 | + | + | + | + | - | + | + | + | + | +  | + | +  | NA | +  | + | Good |
| Wercelens et al. 2023    | + | + | + | + | - | - | - | + | + | NA | + | NA | NA | NA | + | Fair |
| Wu et al. 2022           | + | + | + | - | + | - | - | + | + | NA | - | NA | NA | NA | - | Fair |

Notes: NR = Not reported; NA = Not applicable; “+” indicates meeting criteria; “-” indicates not meeting criteria; Quality rating options, “Good”, “Fair”, or “Poor”.

### NIH Quality Assessment Tool for Observational Cohort and Cross-Sectional Studies

1. Was the research question or objective in this paper clearly stated?
2. Was the study population clearly specified and defined?
3. Was the participation rate of eligible persons at least 50%?
4. Were all the subjects selected or recruited from the same or similar populations (including the same time period)? Were inclusion and exclusion criteria for being in the study prespecified and applied uniformly to all participants?
5. Was a sample size justification, power description, or variance and effect estimates provided?
6. For the analyses in this paper, were the exposure(s) of interest measured prior to the outcome(s) being measured?
7. Was the timeframe sufficient so that one could reasonably expect to see an association between exposure and outcome if it existed?
8. For exposures that can vary in amount or level, did the study examine different levels of the exposure as related to the outcome (e.g., categories of exposure, or exposure measured as continuous variable)?
9. Were the exposure measures (independent variables) clearly defined, valid, reliable, and implemented consistently across all study participants?
10. Was the exposure(s) assessed more than once over time?
11. Were the outcome measures (dependent variables) clearly defined, valid, reliable, and implemented consistently across all study participants?
12. Were the outcome assessors blinded to the exposure status of participants?
13. Was loss to follow-up after baseline 20% or less?

14. Were key potential confounding variables measured and adjusted statistically for their impact on the relationship between exposure(s) and outcome(s)?

Reference:

National Institutes of Health (NIH). Quality Assessment Tool for Observational Cohort and Cross-Sectional Studies. National Heart, Lung, and Blood Institute. <https://www.nhlbi.nih.gov/health-topics/study-quality-assessment-tools>. Accessed January 12, 2024.
